# Supplementary material
Source: ML conference proceedings conference paper supplement (https://proceedings.neurips.cc/paper_files/paper/2020/hash/cd0b43eac0392accf3624b7372dec36e-Abstract.html)
Supplement: Supplementary file [file cd0b43eac0392accf3624b7372dec36e-Supplemental.pdf]

## A Omitted proofs

*Proof of Proposition 1.* We recall the I-MMSE relation (11):

$$\frac{d}{d\beta} \frac{1}{\lambda_N} D(Q_{\beta\lambda_N, N} \| Q_{0, N}) = \frac{1}{2} - \frac{1}{2} \text{MMSE}_N(\beta\lambda_N).$$

Let us first assume that the all-or-nothing phenomenon holds. Since  $D(Q_{0, N} \| Q_{0, N}) = 0$ , we can write

$$\begin{aligned} \lim_{N \rightarrow \infty} \frac{1}{\lambda_N} D(Q_{\beta\lambda_N, N} \| Q_{0, N}) &= \lim_{N \rightarrow \infty} \int_0^\beta \frac{d}{d\kappa} \frac{1}{\lambda_N} D(Q_{\kappa\lambda_N, N} \| Q_{0, N}) d\kappa \\ &= \lim_{N \rightarrow \infty} \int_0^\beta \frac{1}{2} - \frac{1}{2} \text{MMSE}_N(\kappa\lambda_N) d\kappa \\ &\stackrel{(*)}{=} \int_0^\beta \frac{1}{2} - \lim_{N \rightarrow \infty} \text{MMSE}_N(\kappa\lambda_N) d\kappa \\ &= \frac{1}{2}(\beta - 1)_+, \end{aligned}$$

where in  $(*)$  we have used the dominated convergence theorem and the fact that  $\text{MMSE}_N(\kappa\lambda_N) \in [0, 1]$  and where the last equality follows from the all-or-nothing phenomenon.

In the other direction, we use the fact that  $\text{MMSE}_N(\beta\lambda_N)$  is a non-increasing function of  $\beta$  [see, e.g., Mio19, Proposition 1.3.1]. Combined with the I-MMSE relation, this immediately yields that  $\frac{1}{\lambda_N} D(Q_{\beta\lambda_N, N} \| Q_{0, N})$  is convex. We therefore have by standard facts in convex analysis [HUL93, Proposition 4.3.4] that

$$\frac{1}{2} - \frac{1}{2} \lim_{N \rightarrow \infty} \text{MMSE}_N(\beta\lambda_N) = \lim_{N \rightarrow \infty} \frac{d}{d\beta} \frac{1}{\lambda_N} D(Q_{\beta\lambda_N, N} \| Q_{0, N}) = \frac{d}{d\beta} \left( \lim_{N \rightarrow \infty} \frac{1}{\lambda_N} D(Q_{\beta\lambda_N, N} \| Q_{0, N}) \right)$$

for all  $\beta$  for which the right side exists. Since we have assumed that

$$\lim_{N \rightarrow \infty} \frac{1}{\lambda_N} D(Q_{\beta\lambda_N, N} \| Q_{0, N}) = \frac{1}{2}(\beta - 1)_+,$$

the right side is 0 when  $\beta < 1$  and  $\frac{1}{2}$  when  $\beta > 1$ . The all-or-nothing property immediately follows.  $\square$

*Proof of Proposition 2.* The first claim follows directly from Lemma 6. Indeed, for the sparse vector model,  $\log M_p = (1 + o(1))k \log \frac{p}{k}$ , and by Lemma 6,

$$\lim \frac{1}{k \log \frac{p}{k}} \log P_p^{\otimes 2}[\langle \mathbf{X}, \mathbf{X}' \rangle \geq t] = -t. \quad (7)$$

Since  $t < \frac{2t}{1+t}$  for all  $t \in (0, 1)$ , the claim holds.

We now turn to the proof of the all-or-nothing phenomenon. By Theorem 1, it suffices to show

$$D(Q_{2 \log M_p, p} \| Q_{0, p}) = o(\log M_p).$$

We write

$$\begin{aligned} D(Q_{2 \log M_p, p} \| Q_{0, p}) &= \mathbb{E}_{\mathbf{Y} \sim Q_{2 \log M_p, p}} \log \mathbb{E}_{\mathbf{X}' \sim P_p} \exp \left( \sqrt{2 \log M_p} \langle \mathbf{Y}, \mathbf{X}' \rangle - \log M_p \right) \\ &= \mathbb{E}_{\mathbf{X}} \mathbb{E}_{\mathbf{Z}} \log \mathbb{E}_{\mathbf{X}' \sim P_p} \exp \left( \sqrt{2 \log M_p} \langle \mathbf{Z}, \mathbf{X}' \rangle + 2 \log M_p \langle \mathbf{X}, \mathbf{X}' \rangle - \log M_p \right) \end{aligned}$$

Now, given  $\mathbf{X}$  and any vector  $v \in \mathbb{R}^p$ , let us denote by  $v|_{\mathbf{X}} \in \mathbb{R}^p$  the vector given by

$$(v|_{\mathbf{X}})_i := \begin{cases} v_i & \text{if } \mathbf{X}_i \neq 0, \\ 0 & \text{otherwise.} \end{cases}$$

Similarly, let  $v|_{\mathbf{X}^c} := v - v|_{\mathbf{X}}$ . Given  $\mathbf{X}$ , the vectors  $\mathbf{Z}|_{\mathbf{X}}$  and  $\mathbf{Z}|_{\mathbf{X}^c}$  are independent; thus we can apply Jensen's inequality to the expectation with respect to  $\mathbf{Z}|_{\mathbf{X}^c}$  to obtain

$$\begin{aligned} D(Q_{2 \log M_p, p} \| Q_{0, p}) &\leq \mathbb{E}_{\mathbf{X}} \mathbb{E}_{\mathbf{Z}|_{\mathbf{X}}} \log \mathbb{E}_{\mathbf{X}' \sim P_p} \mathbb{E}_{\mathbf{Z}|_{\mathbf{X}^c}} \exp \left( \sqrt{2 \log M_p} \langle \mathbf{Z}, \mathbf{X}' \rangle + 2 \log M_p \langle \mathbf{X}, \mathbf{X}' \rangle - \log M_p \right) \\ &= \mathbb{E}_{\mathbf{X}} \mathbb{E}_{\mathbf{Z}|_{\mathbf{X}}} \log \mathbb{E}_{\mathbf{X}' \sim P_p} \exp \left( \sqrt{2 \log M_p} \langle \mathbf{Z}|_{\mathbf{X}}, \mathbf{X}'|_{\mathbf{X}} \rangle + \log M_p (\|\mathbf{X}'|_{\mathbf{X}^c}\|^2 + 2 \langle \mathbf{X}, \mathbf{X}' \rangle - 1) \right). \end{aligned}$$

Since the entries of  $\mathbf{X}$  and  $\mathbf{X}'$  are all either 0 or  $1/\sqrt{k}$  and  $\mathbf{X}$  has unit norm, we have that  $\langle \mathbf{X}, \mathbf{X}' \rangle = \|\mathbf{X}'|_{\mathbf{X}}\|^2$ , and since  $\mathbf{X}'|_{\mathbf{X}^c}$  and  $\mathbf{X}'|_{\mathbf{X}}$  are orthogonal, we obtain

$$\|\mathbf{X}'|_{\mathbf{X}^c}\|^2 + 2 \langle \mathbf{X}, \mathbf{X}' \rangle - 1 = \langle \mathbf{X}, \mathbf{X}' \rangle.$$

Continuing from above and using that  $\|\mathbf{X}'|_{\mathbf{X}}\|_{\infty} \leq 1/\sqrt{k}$ , we have

$$\begin{aligned} D(Q_{2 \log M_p, p} \| Q_{0, p}) &\leq \mathbb{E}_{\mathbf{X}} \mathbb{E}_{\mathbf{Z}|_{\mathbf{X}}} \log \mathbb{E}_{\mathbf{X}' \sim P_p} \exp \left( \sqrt{2 \log M_p/k} \|\mathbf{Z}|_{\mathbf{X}}\|_1 + \log M_p \langle \mathbf{X}, \mathbf{X}' \rangle \right) \\ &= \mathbb{E}_{\mathbf{X}} \log \mathbb{E}_{\mathbf{X}' \sim P_p} \exp (\log M_p \langle \mathbf{X}, \mathbf{X}' \rangle) + \mathbb{E}_{\mathbf{X}} \mathbb{E}_{\mathbf{Z}|_{\mathbf{X}}} \sqrt{(2 \log M_p/k)} \|\mathbf{Z}|_{\mathbf{X}}\|_1 \\ &\leq \mathbb{E}_{\mathbf{X}} \log \mathbb{E}_{\mathbf{X}' \sim P_p} \exp (\log M_p \langle \mathbf{X}, \mathbf{X}' \rangle) + O \left( \sqrt{2k \log M_p} \right) \end{aligned}$$

Since  $k = o(p)$ , we also have that  $k = o(k \log \frac{p}{k}) = o(\log M_p)$ ; therefore, the second term is  $o(\log M_p)$ . Hence it suffices to focus on the first term.

We proceed via a large deviations argument as in the proof of Theorem 4. Write  $\rho = \langle \mathbf{X}, \mathbf{X}' \rangle$  for the overlap; note that the law of  $\rho$  is the same for all  $\mathbf{X}$  in the support of  $P_p$ , so it suffices to understand  $\log \mathbb{E} \exp (\rho \log M_p)$ . We have, for any fixed positive integer  $\ell$ ,

$$\begin{aligned} \mathbb{E} \exp (\rho \log M_p) &\leq \sum_{m=0}^{\ell-1} P_N[\rho \geq m/\ell] \exp \left( \frac{m+1}{\ell} \log M_p \right) \\ &\leq \ell \cdot \max_{0 \leq m < \ell} \exp \left( \frac{m+1}{\ell} \log M_p + \log P_N[\rho \geq m/\ell] \right), \end{aligned}$$

which implies

$$\limsup_{p \rightarrow \infty} \frac{1}{\log M_p} \log \mathbb{E} \exp (\rho \log M_p) \leq \max_{0 \leq m < \ell} \frac{m+1}{\ell} - \frac{m}{\ell},$$

where we have used (7). Therefore  $\limsup_{p \rightarrow \infty} \frac{1}{\log M_p} \log \mathbb{E} \exp (\rho \log M_p) = O(1/\ell)$ , and letting  $\ell \rightarrow \infty$  proves the claim.  $\square$

*Proof of Proposition 3.* Denote by  $\mathcal{S}_k$  the set of  $k$ -sparse vectors in  $\mathbb{R}^p$ . Note that the cardinality of  $\{0, 1/\sqrt{k}\}^p \cap \mathcal{S}_k$  is  $\binom{p}{k}$  and the cardinality of  $\{-1/\sqrt{k}, 0, 1/\sqrt{k}\}^p \cap \mathcal{S}_k$  is  $\binom{p}{k} 2^k$ . In the case of the Bernoulli prior, the identification  $\mathbf{x} \mapsto x^{\otimes d}$  is a bijection, so  $M_N$  for the Bernoulli prior is  $\binom{p}{k}$ . In the case of the Bernoulli-Rademacher prior, when  $d$  is odd the map  $\mathbf{x} \mapsto x^{\otimes d}$  is still a bijection, but when  $d$  is even, the vectors  $\mathbf{x}$  and  $-\mathbf{x}$  give rise to the same tensor. Therefore  $M_N$  for the Bernoulli-Rademacher prior is either  $\binom{p}{k} 2^k$  or  $\binom{p}{k} 2^{k-1}$ . Nevertheless, using Stirling's approximation, since  $k = o(p)$ , we have for both the Bernoulli and Bernoulli-Rademacher prior that

$$\log M_N = (1 + o(1))k \log \frac{p}{k}.$$

Now notice that the overlap  $\langle \mathbf{X}, \mathbf{X}' \rangle$  in the case that  $\mathbf{x}$  is Bernoulli-Rademacher is stochastically dominated by the overlap when  $\mathbf{x}$  is Bernoulli. To prove this, let us consider the natural coupling between the two different priors on  $\mathbf{x}$ : we first sample  $\mathbf{x}_1$  from the sparse Bernoulli distribution and then choose uniformly at random the signs for the non-zero values of  $\mathbf{x}_1$  to form a sample  $\mathbf{x}_2$  from the Bernoulli-Rademacher distribution. Notice that by triangle inequality under this coupling it holds almost surely

$$\langle \mathbf{x}_2^{\otimes d}, \mathbf{x}_2'^{\otimes d} \rangle \leq |\langle \mathbf{x}_2^{\otimes d}, \mathbf{x}_2'^{\otimes d} \rangle| \leq \langle \mathbf{x}_1^{\otimes d}, \mathbf{x}_1'^{\otimes d} \rangle.$$

For this reason it suffices to prove our result only in the case the prior  $\tilde{P}_p$  is the uniform distribution over  $\{0, 1/\sqrt{k}\}^p \cap \mathcal{S}_k$ . We therefore focus on this case in the rest of the proof.

Now fix any  $t \in [0, 1]$  and notice that by elementary algebra for any  $v, v' \in \mathbb{R}^p$  with  $\|v\| = \|v'\| = 1$  since  $d \geq 2$  it holds  $\langle v^{\otimes d}, v'^{\otimes d} \rangle = \langle v, v' \rangle^d \leq \langle v, v' \rangle^2$ . Hence as  $\mathbf{x}, \mathbf{x}'$  live on the sphere of dimension  $p$ ,

$$\begin{aligned} \mathbb{P}_N^{\otimes 2}[\langle \mathbf{X}, \mathbf{X}' \rangle \geq t] &= \tilde{\mathbb{P}}_p^{\otimes 2}[\langle \mathbf{x}^{\otimes d}, \mathbf{x}'^{\otimes d} \rangle \geq t] = \tilde{\mathbb{P}}_p^{\otimes 2}[\langle \mathbf{x}, \mathbf{x}' \rangle^d \geq t] \\ &\leq \tilde{\mathbb{P}}_p^{\otimes 2}[\langle \mathbf{x}, \mathbf{x}' \rangle^2 \geq t] \\ &= \tilde{\mathbb{P}}_p^{\otimes 2}[\langle \mathbf{x}, \mathbf{x}' \rangle \geq \sqrt{t}]. \end{aligned} \quad (8)$$

Since  $\mathbf{x}, \mathbf{x}'$  are drawn from the uniform distribution over  $\{0, 1/\sqrt{k}\}^p \cap \mathcal{S}_k$ , Lemma 6 combined with (8) yields

$$\lim_{N \rightarrow +\infty} \frac{1}{\log M_N} \log \mathbb{P}_N^{\otimes 2}[\langle \mathbf{X}, \mathbf{X}' \rangle \geq t] \leq -\sqrt{t}.$$

The elementary inequality  $-\sqrt{t} \leq -\frac{2t}{1+t}$  concludes the proof.  $\square$

*Proof of Proposition 4.* Let

$$Z(Y) = \frac{Q_{\lambda_N, N}(Y)}{Q_{0, N}(Y)} = \mathbb{E}_{\mathbf{X}' \sim P_N} \exp\left(\sqrt{\lambda_N} \langle Y, \mathbf{X}' \rangle - \frac{\lambda_N}{2}\right)$$

Following *mutatis mutandis* the first two arguments in the proof of [BMV<sup>+</sup>18, Theorem 5] we obtain

$$D(Q_{\lambda_N, N} \parallel Q_{0, N}) \leq D(\tilde{Q}_{\lambda_N, N} \parallel Q_{0, N}) + o(1) \cdot \sqrt{\mathbb{E}_{\mathbf{Y} \sim Q_{\lambda_N, N}}[\log^2 Z(\mathbf{Y})]}. \quad (9)$$

It is straightforward to see that for all  $Y$ ,

$$|\log Z(Y)| \leq \sqrt{\lambda_N} \max_{X' \in \text{Support}(P_N)} \langle X', Y \rangle + \frac{\lambda_N}{2}$$

which implies that

$$\mathbb{E}_{\mathbf{Y} \sim Q_{\lambda_N, N}} \log^2 Z(\mathbf{Y}) \leq 2\lambda_N \cdot \mathbb{E}_{\mathbf{Y} \sim Q_{\lambda_N, N}} \max_{X' \in \text{Support}(P_N)} \langle X', \mathbf{Y} \rangle^2 + O(\lambda_N^2). \quad (10)$$

Now recall  $\mathbf{Y} = \sqrt{\lambda_N} \mathbf{X} + \mathbf{Z}$  for  $\mathbf{Z} \sim Q_{0, N}$  and for all  $X' \in \text{Support}(P_N)$  it holds  $|\langle \mathbf{X}, X' \rangle| \leq \|\mathbf{X}\| \|X'\| = 1$  almost surely. Hence,

$$\begin{aligned} \mathbb{E}_{\mathbf{Y} \sim Q_{\lambda_N, N}} \max_{X' \in \text{Support}(P_N)} \langle X', \mathbf{Y} \rangle^2 &= \mathbb{E}_{\mathbf{Z} \sim Q_{0, N}} \left( \max_{X' \in \text{Support}(P_N)} |\sqrt{\lambda_N} \langle X', \mathbf{X} \rangle + \langle X', \mathbf{Z} \rangle| \right)^2 \\ &\leq 2\lambda_N + 2\mathbb{E}_{\mathbf{Z} \sim Q_{0, N}} \max_{X' \in \text{Support}(P_N)} \langle X', \mathbf{Z} \rangle^2. \end{aligned}$$

Since  $Q_{0, N}$  is simply the law of a vector with i.i.d. standard Gaussian coordinates and the cardinality of the discrete subset of the sphere  $\text{Support}(P_N)$  is equal to  $M_N$ , by Lemma 5 we have  $\mathbb{E}_{\mathbf{Z} \sim Q_{0, N}} \max_{X' \in \text{Support}(P_N)} \langle X', \mathbf{Z} \rangle^2 = O(\log M_N)$ . Therefore since  $\lambda_N = O(\log M_N)$ ,

$$\mathbb{E}_{\mathbf{Y} \sim Q_{\lambda_N, N}} \max_{X' \in \text{Support}(P_N)} \langle X', \mathbf{Y} \rangle^2 \leq O(\lambda_N + \log M_N) = O(\log M_N).$$

Combining the last inequality with (10), we conclude that

$$\mathbb{E}_{\mathbf{Y} \sim Q_{\lambda_N, N}} \log^2 Z(\mathbf{Y}) = O(\lambda_N^2) = O(\log^2 M_N).$$

Using (9) completes the proof of the proposition.  $\square$

*Proof of Proposition 5.* We let  $C$  denote an absolute positive constant whose value may change from line to line. Let us write  $\mathbf{W} = \langle X, \mathbf{Z} \rangle / \sqrt{\lambda_N}$  and  $\mathbf{W}' = \langle X', \mathbf{Z} \rangle / \sqrt{\lambda_N}$ . Recall that  $X, X'$  lie on the unit sphere with  $\langle X, X' \rangle = \rho$ .

Then  $\mathbf{W}$  and  $\mathbf{W}'$  are jointly Gaussian with mean 0 and covariance  $\frac{1}{\lambda_N} \begin{pmatrix} 1 & \rho \\ \rho & 1 \end{pmatrix} =: \frac{1}{\lambda_N} \Sigma_\rho$ . Under this parametrization, we have

$$\exp(\sqrt{\lambda_N}(\langle X, \mathbf{Z} \rangle + \langle X', \mathbf{Z}' \rangle) - \lambda_N) = \exp(\lambda_N(\mathbf{W} + \mathbf{W}' - 1)).$$

Let us write  $S$  for the set  $\{(w, w') : |w - 1| \leq \lambda_N^{-1/4}, |w' - 1| \leq \lambda_N^{-1/4}\}$ .

We consider three cases:

**Case 1:**  $\rho \leq 0$  Using the moment generating function of the univariate normal distribution yields

$$\mathbb{E} \exp(\lambda_N(\mathbf{W} + \mathbf{W}' - 1)) \mathbb{1}_S(\mathbf{W}, \mathbf{W}') \leq \mathbb{E} \exp(\lambda_N(\mathbf{W} + \mathbf{W}' - 1)) = e^{\lambda_N \rho} \leq 1,$$

so

$$\frac{1}{\lambda_N} \log m_N(\rho) \leq 0 = \left( \frac{\rho}{1 + \rho} \right)_+.$$

**Case 2:**  $\rho \in (0, 1/2]$  Write  $\phi_\rho(w, w')$  for the joint density of  $\mathbf{W}$  and  $\mathbf{W}'$ . Note that on  $S$

$$\begin{aligned} \phi_\rho(w, w') &\leq \frac{\lambda_N}{2\pi(1 - \rho^2)} \exp\left(-\frac{\lambda_N}{2} \mathbf{w}^\top \Sigma_\rho^{-1} \mathbf{w}\right), \quad \mathbf{w} = (w, w') \\ &\leq C e^{-\frac{\lambda_N}{1+\rho} + C\lambda_N^{3/4}}, \end{aligned}$$

where we use that  $\lambda_N \rightarrow +\infty$  as  $N \rightarrow +\infty$ . Hence

$$\begin{aligned} \frac{1}{\lambda_N} \log m_N(\rho) &= \frac{1}{\lambda_N} \log \int_S e^{\lambda_N(w+w'-1)} \phi_\rho(w, w') dw dw' \\ &\leq \frac{1}{\lambda_N} \log \int_S \max_{(w, w') \in S} e^{\lambda_N(w+w'-1)} \cdot \max_{(w, w') \in S} \phi_\rho(w, w') dw dw' \\ &\leq \frac{1}{\lambda_N} \log(\text{vol}(S) \cdot e^{\lambda_N + O(\lambda_N^{3/4})} \cdot C e^{-\frac{\lambda_N}{1+\rho} + C\lambda_N^{3/4}}) \\ &\leq \frac{\rho}{1 + \rho} + \frac{C}{\lambda_N^{1/4}}. \end{aligned}$$

**Case 3:**  $\rho \in (1/2, 1]$  The sum  $\mathbf{W} + \mathbf{W}'$  is Gaussian with mean 0 and variance  $\frac{2}{\lambda_N}(1 + \rho)$ , and if  $(w, w') \in S$ , then  $|w + w' - 2| \leq 2\lambda_N^{-1/4}$ .

We obtain

$$m_N(\rho) = \mathbb{E} \exp(\lambda_N(\mathbf{W} + \mathbf{W}' - 1)) \mathbb{1}_S(\mathbf{W}, \mathbf{W}') \leq \mathbb{E} \exp(\lambda_N(\mathbf{W}'' - 1)) \mathbb{1}_{|\mathbf{W}'' - 2| \leq 2\lambda_N^{-1/4}},$$

where  $\mathbf{W}'' \sim \mathcal{N}(0, \frac{2}{\lambda_N}(1 + \rho))$ . Similar with the analysis in Case 2, the density of  $\mathbf{W}''$  is bounded by  $C e^{-\frac{\lambda_N}{1+\rho} + C\lambda_N^{3/4}}$  on the set  $T := \{w'' : |w'' - 2| \leq 2\lambda_N^{-1/4}\}$ , and we obtain

$$\begin{aligned} \frac{1}{\lambda_N} \log m_N(\rho) &\leq \frac{1}{\lambda_N} \log \int_T \max_{w'' \in T} e^{\lambda_N(w'' - 1)} \cdot C e^{-\frac{\lambda_N}{1+\rho} + C\lambda_N^{3/4}} \\ &\leq \frac{1}{\lambda_N} \log(\text{vol}(T) \cdot e^{\lambda_N + O(\lambda_N^{3/4})} \cdot C e^{-\frac{\lambda_N}{1+\rho} + C\lambda_N^{3/4}}) \\ &\leq \frac{\rho}{1 + \rho} + \frac{C}{\lambda_N^{1/4}}, \end{aligned}$$

as claimed.  $\square$

## B Additional lemmas

**Lemma 1.** For all  $N$  and  $\lambda > 0$ , the function  $\beta \mapsto \frac{1}{\lambda} \text{D}(\mathbb{Q}_{\beta\lambda, N} \| \mathbb{Q}_{0, N})$  is nonnegative, nondecreasing, and  $1/2$ -Lipschitz.

*Proof.* Let us fix some  $N$  and  $\lambda$ . The nonnegativity follows from the nonnegativity of the KL divergence. By Lemma 2, we have

$$\frac{1}{\lambda} D(Q_{\beta\lambda, N} \| Q_{0, N}) = \frac{\beta}{2} - \frac{1}{\lambda} I_{\beta\lambda, N}(\mathbf{X}; \mathbf{Y}).$$

Differentiating with respect to  $\beta$  and using the I-MMSE theorem [GSV05] we conclude

$$\frac{d}{d\beta} \frac{1}{\lambda} D(Q_{\beta\lambda, N} \| Q_{0, N}) = \frac{1}{2} - \frac{1}{2} \text{MMSE}_N(\beta\lambda). \quad (11)$$

The results that  $\beta \mapsto \frac{1}{\lambda} D(\mathbf{Y}_{\beta\lambda} \| \mathbf{Z})$  is nondecreasing and  $1/2$ -Lipschitz follow directly from the fact that  $\text{MMSE}_N(\beta\lambda) \in [0, 1]$ .  $\square$

**Lemma 2.** Denote by  $I_{\lambda, N}(\mathbf{X}; \mathbf{Y})$  the mutual information between  $\mathbf{X}$  and  $\mathbf{Y}$  in (1), and denote by  $Q_{\lambda, N}^{(\mathbf{X}, \mathbf{Y})}$  their joint law. Then

$$I_{\lambda, N}(\mathbf{X}; \mathbf{Y}) = D(Q_{\lambda, N}^{(\mathbf{X}, \mathbf{Y})} \| P_N \otimes Q_{\lambda, N}) = \frac{\lambda}{2} - D(Q_{\lambda, N} \| Q_{0, N}).$$

*Proof.* The first equality is the definition of mutual information. We then have

$$\begin{aligned} D(Q_{\lambda, N}^{(\mathbf{X}, \mathbf{Y})} \| P_N \otimes Q_{\lambda, N}) &= \mathbb{E}_{Q_{\lambda, N}^{(\mathbf{X}, \mathbf{Y})}} \log \frac{Q_{\lambda, N}(\mathbf{Y} | \mathbf{X})}{Q_{\lambda, N}(\mathbf{Y})} \\ &= \mathbb{E}_{Q_{\lambda, N}^{(\mathbf{X}, \mathbf{Y})}} \log \frac{Q_{\lambda, N}(\mathbf{Y} | \mathbf{X})}{Q_{0, N}(\mathbf{Y})} - \mathbb{E}_{Q_{\lambda, N}^{(\mathbf{X}, \mathbf{Y})}} \log \frac{Q_{\lambda, N}(\mathbf{Y})}{Q_{0, N}(\mathbf{Y})}. \end{aligned}$$

Using the fact that  $\mathbf{Z}$  has i.i.d. standard Gaussian entries we have

$$\mathbb{E}_{Q_{\lambda, N}^{(\mathbf{X}, \mathbf{Y})}} \log \frac{Q_{\lambda, N}(\mathbf{Y} | \mathbf{X})}{Q_{0, N}(\mathbf{Y})} = \mathbb{E}_{Q_{\lambda, N}^{(\mathbf{X}, \mathbf{Y})}} \frac{\|\mathbf{Y}\|_2^2 - \|\mathbf{Y} - \sqrt{\lambda}\mathbf{X}\|_2^2}{2} = \frac{\lambda}{2},$$

and by definition

$$D(Q_{\lambda, N} \| Q_{0, N}) = \mathbb{E}_{Q_{\lambda, N}} \log \frac{Q_{\lambda, N}(\mathbf{Y})}{Q_{0, N}(\mathbf{Y})}.$$

The claim follows.  $\square$

**Lemma 3.** For all  $\lambda \geq 0$ ,

$$D(Q_{\lambda, N} \| Q_{0, N}) \geq \frac{\lambda}{2} - \log M_N.$$

*Proof.* Writing explicitly the Kullback-Leibler divergence gives

$$\begin{aligned} D(Q_{\lambda, N} \| Q_{0, N}) &= \mathbb{E} \log \frac{1}{M_N} \sum_{X' \in \text{Support}(P_N)} \exp\left(\sqrt{\lambda}\langle \mathbf{Y}, X' \rangle - \frac{\lambda}{2}\right) \quad \mathbf{Y} \sim Q_{\lambda, N} \\ &\geq \mathbb{E} \log \frac{1}{M_N} \exp\left(\sqrt{\lambda}\langle \mathbf{Z}, \mathbf{X} \rangle + \frac{\lambda}{2}\right) \\ &= \mathbb{E} \left\{ \sqrt{\lambda}\langle \mathbf{Z}, \mathbf{X} \rangle + \frac{\lambda}{2} - \log M_N \right\} = \frac{\lambda}{2} - \log M_N, \end{aligned}$$

where the inequality follows from writing  $\mathbf{Y} = \sqrt{\lambda}\mathbf{X} + \mathbf{Z}$  and taking only the  $X' = \mathbf{X}$  term in the sum.  $\square$

**Lemma 4.** Let  $\alpha_1 = (\alpha_1)_{N \in \mathbb{N}}$  and  $\alpha_2 = (\alpha_2)_{N \in \mathbb{N}}$  be two sequences in  $[0, 1]$  such that  $\alpha_1 = 1 - o(1)$  and  $\alpha_2 = o(1)$  as  $N \rightarrow \infty$ , and let  $\lambda_N$  be any sequence tending to infinity as  $N \rightarrow +\infty$  such that  $\frac{1}{\lambda_N} d(\alpha_1 \| \alpha_2)$  is bounded. Then

$$\limsup_{N \rightarrow \infty} \frac{1}{\lambda_N} d(\alpha_1 \| \alpha_2) = \limsup_{N \rightarrow \infty} \frac{1}{\lambda_N} \log \frac{1}{\alpha_2}.$$

*Proof.* The given asymptotics imply

$$\lim_{N \rightarrow \infty} (1 - \alpha_1) \log \frac{1 - \alpha_1}{1 - \alpha_2} = 0.$$

Moreover, since  $\alpha_1 \log \alpha_1$  is bounded, we have

$$\lim_{N \rightarrow \infty} \frac{1}{\lambda_N} \alpha_1 \log \alpha_1 = 0.$$

Combining these facts yields

$$\begin{aligned} \limsup_{N \rightarrow \infty} \frac{1}{\lambda_N} d(\alpha_1 \parallel \alpha_2) &= \limsup_{N \rightarrow \infty} \frac{1}{\lambda_N} \alpha_1 \log \frac{\alpha_1}{\alpha_2} + (1 - \alpha_1) \log \frac{1 - \alpha_1}{1 - \alpha_2} \\ &= \limsup_{N \rightarrow \infty} \frac{1}{\lambda_N} \alpha_1 \log \frac{1}{\alpha_2}. \end{aligned}$$

Since  $\frac{1}{\lambda_N} d(\alpha_1 \parallel \alpha_2)$  is bounded, so is the sequence  $\frac{1}{\lambda_N} \alpha_1 \log \frac{1}{\alpha_2}$ , and since  $\alpha_1$  is bounded away from 0, this implies that  $\frac{1}{\lambda_N} \log \frac{1}{\alpha_2}$  is bounded as well. Using that  $\lim_{N \rightarrow \infty} \alpha_1 = 1$  therefore yields the claim.  $\square$

**Lemma 5.** *Let  $M, N \in \mathbb{N}$  and let  $S$  be a discrete subset of the  $N$ -dimensional unit sphere with cardinality  $M$ . Then for  $G$  the law of the  $N$ -dimensional random variable  $\mathbf{Z}$  with i.i.d. standard Gaussian coordinates it holds*

$$E_{\mathbf{Z} \sim G} \max_{X' \in S} \langle X', \mathbf{Z} \rangle^2 = O(\log M).$$

*Proof.* It suffices to show that

$$E_{\mathbf{Z} \sim G} \max_{X' \in S} \langle X', \mathbf{Z} \rangle^2 \mathbb{1} \left( \max_{X' \in S} \langle X', \mathbf{Z} \rangle^2 \geq 2 \log M \right) = O(1).$$

or

$$\int_0^\infty G \left( \max_{X' \in S} \langle X', \mathbf{Z} \rangle^2 \geq 2 \log M + t \right) dt = O(1).$$

Using a union bound argument and the fact that for all  $X' \in S$  the quantity  $\langle X', \mathbf{Z} \rangle$  follows a standard Gaussian distribution, we have for all  $t \geq 0$ ,

$$G \left( \max_{X' \in S} \langle X', \mathbf{Z} \rangle^2 \geq 2 \log M + t \right) \leq M \exp \left( -\log M - \frac{t}{2} \right) = \exp \left( -\frac{t}{2} \right).$$

Hence

$$\int_0^\infty G \left( \max_{X' \in S} \langle X', \mathbf{Z} \rangle^2 \geq 2 \log M + t \right) dt \leq \int_0^\infty \exp \left( -\frac{t}{2} \right) dt = O(1),$$

as we wanted.  $\square$

**Lemma 6.** *Suppose that  $k = o(p)$  and the prior  $\tilde{\mathbb{P}}_p$  is the uniform distribution on all the  $k$ -sparse vectors with elements either 0 or  $1/\sqrt{k}$ . Then for any  $t \in [0, 1]$  it holds*

$$\lim_{p \rightarrow +\infty} \frac{1}{k \log \frac{p}{k}} \log \tilde{\mathbb{P}}_p^{\otimes 2}[\langle \mathbf{x}, \mathbf{x}' \rangle \geq t] = -t.$$

*Proof.* First note that the claim follows immediately when  $t = 1$  as when  $k = o(p)$ , the distribution  $\tilde{\mathbb{P}}_p$  is distribution over a discrete subset of the unit sphere of cardinality  $(1 + o(1))k \log \frac{p}{k}$ . Similarly, since for all  $v, v'$  in the support of  $\tilde{\mathbb{P}}_p$  it holds  $\langle v, v' \rangle \geq 0$ , the claim also follows straightforwardly for  $t = 0$ . For the rest of the proof we assume  $t \in (0, 1)$ .

We first show that the limit superior is bounded above by  $-t$ . The distribution of the rescaled overlap  $k\langle \mathbf{x}, \mathbf{x}' \rangle = \langle \sqrt{k}\mathbf{x}, \sqrt{k}\mathbf{x}' \rangle$  follows the Hypergeometric distribution  $\text{Hyp}(p, k, k)$  with probability mass function  $p(s) = \binom{k}{s} \binom{p-k}{k-s} / \binom{p}{k}$ , for  $s = 0, \dots, k$ . Therefore for a fixed  $t \in (0, 1]$ ,

$$\tilde{\mathbb{P}}_p^{\otimes 2}[\langle \mathbf{x}, \mathbf{x}' \rangle \geq t] = \sum_{s=\lceil tk \rceil}^k p(s). \quad (12)$$

Now for any  $s \geq \lceil tk \rceil$  it holds

$$\frac{p(s+1)}{p(s)} = \frac{\binom{k}{s+1} \binom{p-k}{k-s-1}}{\binom{k}{s} \binom{p-k}{k-s}} = \frac{(k-s)^2}{(s+1)(p-2k+s+1)}.$$

Using that  $k = o(p)$  and  $s \geq tk$  we conclude that for sufficiently large  $p$  and all  $s \geq \lceil tk \rceil$  it holds

$$\frac{p(s+1)}{p(s)} \leq 2 \frac{k}{tp} < \frac{1}{2}.$$

or by telescopic product,

$$\frac{p(s)}{p(\lceil tk \rceil)} \leq \frac{1}{2^{s-\lceil tk \rceil}}.$$

Hence, using (12) we have for large enough values of  $p$ ,

$$\tilde{\mathbb{P}}_p^{\otimes 2}[\langle \mathbf{x}, \mathbf{x}' \rangle \geq t] \leq \sum_{s=\lceil tk \rceil}^k p(\lceil tk \rceil) \frac{1}{2^{s-\lceil tk \rceil}} \leq 2p(\lceil tk \rceil). \quad (13)$$

We have

$$p(\lceil tk \rceil) = \binom{k}{\lceil tk \rceil} \binom{p-k}{k-\lceil tk \rceil} / \binom{p}{k}$$

and combining with the elementary bound  $\log \binom{m_1}{m_2} = m_2 \log \left( \frac{em_1}{m_2} \right) + O(m_2)$ , for  $m_1 \leq m_k$ , we obtain

$$\begin{aligned} \log p(\lceil tk \rceil) &= tk \log \frac{1}{t} + (1-t)k \log \frac{p-k}{(1-t)k} - k \log \frac{p}{k} + O(k) \\ &= -tk \log \frac{p}{k} + O(k), \end{aligned} \quad (14)$$

where in the second step we have used that, for fixed  $t \in (0, 1)$ , if  $k = o(p)$ , then

$$\log \frac{p-k}{(1-t)k} = \log \frac{p}{k} + O(1).$$

We therefore conclude

$$\log \tilde{\mathbb{P}}_p^{\otimes 2}[\langle \mathbf{x}, \mathbf{x}' \rangle \geq t] \leq \log p(\lceil tk \rceil) = -tk \log \frac{p}{k} + O(k). \quad (15)$$

Using the fact that  $k = o(p)$  completes the proof of the upper bound.

We now prove the lower bound. By (12),

$$\tilde{\mathbb{P}}_p^{\otimes 2}[\langle \mathbf{x}, \mathbf{x}' \rangle \geq t] \geq p(\lceil tk \rceil),$$

and combining this with (14) yields the claim.  $\square$
